# Supplementary material for: Isolation and characterization of the first bis(2-pyridyl)carbyltitanium(iv) complex derived from the C–O bond cleavage of the alkoxide ligand in Cp*TiMe2(OCMePy2). X-Ray crystal structure of [Cp*Ti(μ-O)(CMePy2)]2 (Cp* = C5Me5)
Source: Royal Society of Chemistry journal article supplement (doi:10.1039/b106481a), 2002-01-01
Supplement: b106481a.doc [file b106481a.doc]

**SUPPLEMENTARY MATERIAL**

Title : Isolation and Characterization of the First Bis(2-pyridyl)carbyltitanium (IV) Complex Derived from the C-O Bond Cleavage of the Alkoxide Ligand in Cp*TiMe2(OCMePy2).X-ray Crystal Structure of [Cp*Ti(2-O)(CmePy2)]2. (Cp*=C5Me5).

Authors : Rosa Fandos, Carolina Hernandez, Antonio Otero, Ana Rodriguez, Maria Jose Ruiz, Pilar Terreros.

# **EXPERIMENTAL SECTION**

The preparation and handling of described compounds was performed with rigorous exclusion of air and moisture under nitrogen atmosphere using standard vacuum line and Schlenk techniques. All solvents were dried and distilled under a nitrogen atmosphere.

1H and 13C NMR spectra were recorded on 200 Mercury Varian Fourier Transform spectrometer. Trace amounts of protonated solvents were used as references, and chemical shifts are reported in units of parts per million relative to SiMe4.

IR spectra were recorded in the region 4000-400 cm-1 with a Nicolet Magna-IR 550 spectrophotometer as Nujol mulls using PET cells.

Synthesis of [Cp*Ti(2-O)(CMePy2)]2 (**2**)

To a mixture of Cp*TiMe2(OCMePy2) (0.080 g, 0.194 mmol) and xylylisocyanide (0.025 g, 0.194 mmol) were added 3 mL of toluene and the solution was stirred, at room temperature, for 1 h. Slow diffusion of pentane into the toluene solution yielded 0.058 g (80%) of green crystals which were identified as complex **2**. Spectroscopic data for **2:** 1H NMR (200 MHz, C6D6, room temperature): 1.53 (s, 15 H, Cp*), 2.14 (s, 3 H, C*H3*CPy2), 6.20 (m, 2 H, py), 6.97 (m, 4 H, py), 9.47 (m, 2 H, py). 13C NMR 12.0 (s, Cp*), 20.2 (s, *C*H3CPy2), CH3*C*Py2 (not found), 107.4 (s, Cp*), 122.2 (s, C-H), 124.9 (s, C-H), 133.7 (s, C-H), 151.0 (s, C-H), 155.0 (s, Cipso). IR: cm-1 1569 (w), 1542 (w), 1303 (m), 1163 (m), 962 (s), 949 (vs), 636 (m), 608 (s). Elemental Anal. Calc, for C44H52N4O2Ti2, C, 69.07; H, 6.80; N, 7.32. Found : C, 68.53; H, 6.80; N, 7.12%.

Synthesis of [Cp*Ti(xylylNCMe2)(OCMePy2)] (**3**)

To a mixture of Cp*TiMe2(OCMePy2) (0.136 g, 0.329 mmol) and xylylisocyanide (0.043 g, 0.329 mmol) were added 5 mL of toluene and the solution was stirred, at room temperature, for 10 min. After this time, the solvent was removed under vacuum and the residue was extracted with pentane to yield by cooling 0.149 g (85%) of brown crystals which were identified as complex **3**. Spectroscopic data for **3**: NMR 13C 13.0 (s, Cp*), 20.8 (s, *C*H3C), 22.2 (s, *C*H3C), 24.2 (s, *C*H3C), 25.3 (s, *C*H3C), 35.4 (s, *C*H3C), 71.9 (s, *C*=N), 90.7 (s, *C*-O), 121.1 (s, *C*-H), 121.2 (s, *C*-H), 121.7 (s, *C*-H), 121.8 (s, *C*-H), 123.6 (s, *C*-H), 124.8 (s, *C*-H), 125.2 (s, Cp*), 128.3 (s, *C*-H), 136.1 (s, *C*-H), 136.4 (s, *C*-H), 145.8 (s, *C*-H), 147.1 (s, *C*ipso), 148.0 (s, *C*-H), 149.8 (s, *C*ipso), 167.3 (s, *C*ipso), 171.3 (s, *C*ipso). IR: cm-1 1666 (w), 1586 (s), 1076 (m), 870 (m), 804 (m), 764 (m), 579 (w), 453 (w). Elemental Anal.Calc, for C33H41N3O1T1, C, 72.94; H, 7.55; N, 7.73. Found :C, 73.08; H, 7.48; N, 7.75%.

**CRYSTALLOGRAPHIC SUPPLEMENTARY MATERIAL**

# Table S1 - Crystal Data and Structure Refinement for 2.

**Table S2** - Atomic coordinates ( x 104) and equivalent isotropic displacement parameters (Å2 x 103) for **2**.

**Table S3** - Bond lengths (Å) and angles (degrees) for **2.**

**Table S4** - Anisotropic Displacement Parameters (Å2 x 103) for **2.**

**Table S5** - Hydrogen coordinates ( x 104) and isotropic displacement parameters (Å2 x 103) for **2.**

**Table S1.** Crystal data and structure refinement for **2**.

| Identification code | 2 |
| --- | --- |
| Empirical formula | C44 H52 N4 O2 Ti2 |
| Formula weight | 764.70 |
| Temperature | 200(2) K |
| Wavelength | 0.71070 Å |
| Crystal system, space group | Monoclinic, P21/n |
| Unit cell dimensions | a = 11.034(2) Å alpha = 90 deg. |
|  | b = 10.346(3) Å beta = 103.960(10) deg. |
|  | c = 16.992(7) Å gamma = 90 deg. |
| Volume | 1882.5(10) Å3 |
| Z, Calculated density | 2, 1.349 g/cm3 |
| Absorption coefficient | 4.68 cm-1 |
| F(000) | 808 |
| Crystal size | 0.3 x 0.2 x 0.2 |
| Theta range for data collection | 2.32 to 22.00 deg. |
| Limiting indices | 0<=h<=11, 0<=k<=10, -17<=l<=17 |
| Reflections collected / unique | 2288 / 2288 [R(int) = 0.0000] |
| Completeness to theta = 22.00 | 99.3 % |
| Refinement method | Full-matrix least-squares on F2 |
| Data / restraints / parameters | 2288 / 0 / 236 |
| Goodness-of-fit on F2 | 1.067 |
| Final R indices [*I>2sigma(I)*] | R1 = 0.0971, wR2 = 0.2134 |
| R indices (all data) | R1 = 0.1913, wR2 = 0.2910 |
| Extinction coefficient | 0.0015(12) |
| Largest diff. peak and hole | 0.431 and -0.447 e. Å-3 |

**Table S2.** Atomic coordinates ( x 104) and equivalent isotropic displacement parameters (Å2 x 103) for **2**. U(eq) is defined as one third of the trace of the orthogonalized Uij tensor.

|  | x | y | z | U(eq) |
| --- | --- | --- | --- | --- |
| Ti(1) | 9263(2) | 3926(2) | 10144(1) | 39(1) |
| O(1) | 9408(6) | 5039(7) | 9321(5) | 38(2) |
| N(1) | 8658(9) | 4035(9) | 11257(6) | 44(3) |
| N(2) | 7249(8) | 4126(10) | 9627(6) | 45(3) |
| C(1) | 9515(12) | 4441(13) | 11930(8) | 53(4) |
| C(2) | 9350(15) | 4395(14) | 12695(7) | 63(4) |
| C(3) | 8313(16) | 3830(16) | 12849(9) | 73(5) |
| C(4) | 7418(14) | 3389(16) | 12225(10) | 69(5) |
| C(5) | 7555(12) | 3507(12) | 11414(9) | 51(4) |
| C(6) | 6568(13) | 3160(13) | 10759(9) | 54(4) |
| C(7) | 5556(13) | 2274(14) | 10974(11) | 79(5) |
| C(8) | 6315(10) | 3584(12) | 9957(8) | 42(3) |
| C(9) | 5071(11) | 3617(13) | 9457(9) | 55(4) |
| C(10) | 4752(11) | 4075(15) | 8719(10) | 65(4) |
| C(11) | 5681(11) | 4635(13) | 8400(7) | 49(4) |
| C(12) | 6886(13) | 4619(14) | 8869(8) | 60(4) |
| C(13) | 8656(11) | 1643(13) | 9733(9) | 50(4) |
| C(14) | 9463(14) | 2157(12) | 9279(8) | 58(5) |
| C(15) | 10640(9) | 2390(11) | 9815(7) | 28(3) |
| C(16) | 10546(12) | 2098(12) | 10586(8) | 49(4) |
| C(17) | 9362(11) | 1536(12) | 10541(9) | 49(4) |
| C(18) | 7397(12) | 1081(13) | 9366(11) | 85(6) |
| C(19) | 9121(13) | 2336(13) | 8372(9) | 63(4) |
| C(20) | 11812(11) | 2796(11) | 9576(8) | 49(4) |
| C(21) | 11584(12) | 2138(13) | 11355(9) | 60(4) |
| C(22) | 8909(12) | 975(13) | 11217(10) | 69(5) |

**Table S3.** Bond lengths [Å] and angles [deg] for **2**.

| Ti(1)-O(1) | 1.848(8) |
| --- | --- |
| Ti(1)-O(1)#1 | 1.865(7) |
| Ti(1)-N(1) | 2.155(10) |
| Ti(1)-N(2) | 2.194(9) |
| Ti(1)-C(15) | 2.357(10) |
| Ti(1)-C(16) | 2.372(12) |
| Ti(1)-C(14) | 2.391(11) |
| Ti(1)-C(13) | 2.508(13) |
| Ti(1)-C(17) | 2.558(13) |
| Ti(1)-Ti(1)#1 | 2.865(4) |
| O(1)-Ti(1)#1 | 1.865(7) |
| N(1)-C(1) | 1.363(15) |
| N(1)-C(5) | 1.417(15) |
| N(2)-C(12) | 1.353(15) |
| N(2)-C(8) | 1.402(15) |
| C(1)-C(2) | 1.357(16) |
| C(2)-C(3) | 1.37(2) |
| C(3)-C(4) | 1.34(2) |
| C(4)-C(5) | 1.428(18) |
| C(5)-C(6) | 1.403(18) |
| C(6)-C(8) | 1.395(17) |
| C(6)-C(7) | 1.554(19) |
| C(8)-C(9) | 1.430(16) |
| C(9)-C(10) | 1.306(17) |
| C(10)-C(11) | 1.396(18) |
| C(11)-C(12) | 1.375(16) |
| C(13)-C(17) | 1.410(17) |
| C(13)-C(14) | 1.414(19) |
| C(13)-C(18) | 1.496(17) |
| C(14)-C(15) | 1.415(16) |
| C(14)-C(19) | 1.508(19) |
| C(15)-C(16) | 1.372(16) |
| C(15)-C(20) | 1.505(15) |
| C(16)-C(17) | 1.415(17) |
| C(16)-C(21) | 1.517(17) |
| C(17)-C(22) | 1.477(18) |
| O(1)-Ti(1)-O(1)#1 | 79.0(4) |
| O(1)-Ti(1)-N(1) | 137.1(4) |
| O(1)#1-Ti(1)-N(1) | 85.2(4) |
| O(1)-Ti(1)-N(2) | 84.4(4) |
| O(1)#1-Ti(1)-N(2) | 138.0(4) |
| N(1)-Ti(1)-N(2) | 81.3(4) |
| O(1)-Ti(1)-C(15) | 93.6(4) |
| O(1)#1-Ti(1)-C(15) | 91.5(3) |
| N(1)-Ti(1)-C(15) | 126.7(4) |
| N(2)-Ti(1)-C(15) | 128.1(4) |
| O(1)-Ti(1)-C(16) | 125.6(4) |
| O(1)#1-Ti(1)-C(16) | 88.0(4) |
| N(1)-Ti(1)-C(16) | 93.0(4) |
| N(2)-Ti(1)-C(16) | 132.1(4) |
| C(15)-Ti(1)-C(16) | 33.7(4) |
| O(1)-Ti(1)-C(14) | 88.5(4) |
| O(1)#1-Ti(1)-C(14) | 124.1(5) |
| N(1)-Ti(1)-C(14) | 132.4(5) |
| N(2)-Ti(1)-C(14) | 93.5(4) |
| C(15)-Ti(1)-C(14) | 34.7(4) |
| C(16)-Ti(1)-C(14) | 56.5(4) |
| O(1)-Ti(1)-C(13) | 116.2(4) |
| O(1)#1-Ti(1)-C(13) | 143.3(4) |
| N(1)-Ti(1)-C(13) | 100.1(4) |
| N(2)-Ti(1)-C(13) | 78.5(4) |
| C(15)-Ti(1)-C(13) | 56.1(4) |
| C(16)-Ti(1)-C(13) | 55.7(4) |
| C(14)-Ti(1)-C(13) | 33.5(4) |
| O(1)-Ti(1)-C(17) | 142.7(4) |
| O(1)#1-Ti(1)-C(17) | 116.6(4) |
| N(1)-Ti(1)-C(17) | 79.8(4) |
| N(2)-Ti(1)-C(17) | 99.8(4) |
| C(15)-Ti(1)-C(17) | 54.7(4) |
| C(16)-Ti(1)-C(17) | 33.1(4) |
| C(14)-Ti(1)-C(17) | 54.4(5) |
| C(13)-Ti(1)-C(17) | 32.3(4) |
| O(1)-Ti(1)-Ti(1)#1 | 39.7(2) |
| O(1)#1-Ti(1)-Ti(1)#1 | 39.3(2) |
| N(1)-Ti(1)-Ti(1)#1 | 114.7(3) |
| N(2)-Ti(1)-Ti(1)#1 | 114.9(3) |
| C(15)-Ti(1)-Ti(1)#1 | 93.3(3) |
| C(16)-Ti(1)-Ti(1)#1 | 110.6(4) |
| C(14)-Ti(1)-Ti(1)#1 | 110.4(4) |
| C(13)-Ti(1)-Ti(1)#1 | 143.8(3) |
| C(17)-Ti(1)-Ti(1)#1 | 143.6(3) |
| Ti(1)-O(1)-Ti(1)#1 | 101.0(4) |
| C(1)-N(1)-C(5) | 114.5(11) |
| C(1)-N(1)-Ti(1) | 116.9(8) |
| C(5)-N(1)-Ti(1) | 127.4(9) |
| C(12)-N(2)-C(8) | 116.9(10) |
| C(12)-N(2)-Ti(1) | 117.1(8) |
| C(8)-N(2)-Ti(1) | 125.0(8) |
| C(2)-C(1)-N(1) | 124.5(13) |
| C(1)-C(2)-C(3) | 120.8(15) |
| C(4)-C(3)-C(2) | 119.0(13) |
| C(3)-C(4)-C(5) | 120.3(14) |
| C(6)-C(5)-N(1) | 119.2(12) |
| C(6)-C(5)-C(4) | 120.1(13) |
| N(1)-C(5)-C(4) | 120.7(13) |
| C(8)-C(6)-C(5) | 128.9(13) |
| C(8)-C(6)-C(7) | 115.5(13) |
| C(5)-C(6)-C(7) | 115.4(13) |
| C(6)-C(8)-N(2) | 121.6(11) |
| C(6)-C(8)-C(9) | 121.6(12) |
| N(2)-C(8)-C(9) | 116.5(11) |
| C(10)-C(9)-C(8) | 125.2(12) |
| C(9)-C(10)-C(11) | 118.0(12) |
| C(12)-C(11)-C(10) | 117.9(13) |
| N(2)-C(12)-C(11) | 125.4(13) |
| C(17)-C(13)-C(14) | 106.7(11) |
| C(17)-C(13)-C(18) | 127.9(13) |
| C(14)-C(13)-C(18) | 124.2(14) |
| C(17)-C(13)-Ti(1) | 75.8(7) |
| C(14)-C(13)-Ti(1) | 68.7(7) |
| C(18)-C(13)-Ti(1) | 129.9(9) |
| C(13)-C(14)-C(15) | 108.3(11) |
| C(13)-C(14)-C(19) | 124.6(14) |
| C(15)-C(14)-C(19) | 127.0(14) |
| C(13)-C(14)-Ti(1) | 77.8(7) |
| C(15)-C(14)-Ti(1) | 71.4(6) |
| C(19)-C(14)-Ti(1) | 119.8(8) |
| C(16)-C(15)-C(14) | 107.9(11) |
| C(16)-C(15)-C(20) | 125.9(11) |
| C(14)-C(15)-C(20) | 126.1(12) |
| C(16)-C(15)-Ti(1) | 73.7(6) |
| C(14)-C(15)-Ti(1) | 74.0(6) |
| C(20)-C(15)-Ti(1) | 121.3(8) |
| C(15)-C(16)-C(17) | 108.7(12) |
| C(15)-C(16)-C(21) | 127.0(12) |
| C(17)-C(16)-C(21) | 123.6(13) |
| C(15)-C(16)-Ti(1) | 72.5(7) |
| C(17)-C(16)-Ti(1) | 80.7(7) |
| C(21)-C(16)-Ti(1) | 121.3(8) |
| C(13)-C(17)-C(16) | 107.8(12) |
| C(13)-C(17)-C(22) | 125.2(11) |
| C(16)-C(17)-C(22) | 126.9(13) |
| C(13)-C(17)-Ti(1) | 71.9(8) |
| C(16)-C(17)-Ti(1) | 66.2(7) |
| C(22)-C(17)-Ti(1) | 125.7(9) |

Symmetry transformations used to generate equivalent atoms:

#1 -x+2,-y+1,-z+2

**Table S4.** Anisotropic displacement parameters (Å2 x 103) for **2**. The anisotropic displacement factor exponent takes the form:

-2 2 [ h2 a*2 U11 + ... + 2 h k a* b* U12 ]

|  | U11 | U22 | U33 | U23 | U13 | U12 |
| --- | --- | --- | --- | --- | --- | --- |
| Ti(1) | 26(1) | 39(1) | 56(2) | -3(1) | 14(1) | 3(1) |
| O(1) | 29(4) | 34(5) | 51(5) | -8(4) | 8(4) | -11(4) |
| N(1) | 39(6) | 38(6) | 53(7) | -2(5) | 8(5) | 4(5) |
| N(2) | 33(6) | 44(6) | 58(7) | -6(6) | 11(5) | 4(5) |
| C(1) | 45(8) | 67(10) | 46(9) | 2(8) | 10(7) | 12(7) |
| C(2) | 91(12) | 72(11) | 30(8) | 8(7) | 21(8) | 32(9) |
| C(3) | 82(12) | 85(12) | 71(11) | 11(10) | 59(10) | 34(10) |
| C(4) | 64(10) | 79(12) | 78(12) | 40(10) | 46(9) | 11(9) |
| C(5) | 46(8) | 43(8) | 72(10) | 9(7) | 27(8) | 18(7) |
| C(6) | 59(9) | 47(9) | 65(10) | -2(8) | 29(8) | 14(7) |
| C(7) | 53(9) | 54(10) | 133(16) | 33(10) | 28(10) | 3(8) |
| C(8) | 28(7) | 39(8) | 61(9) | -8(7) | 12(6) | 0(6) |
| C(9) | 36(8) | 55(10) | 76(11) | -2(8) | 18(8) | -18(7) |
| C(10) | 28(7) | 78(11) | 83(12) | -4(10) | 2(8) | -4(8) |
| C(11) | 31(7) | 60(9) | 50(8) | 5(7) | -1(7) | -2(7) |
| C(12) | 58(10) | 58(10) | 53(9) | 5(8) | -6(8) | -6(7) |
| C(13) | 30(7) | 58(9) | 73(10) | -21(8) | 39(8) | -5(7) |
| C(14) | 89(11) | 36(8) | 35(8) | -22(6) | -13(8) | 42(8) |
| C(15) | 12(6) | 50(7) | 26(7) | -19(6) | 11(5) | 7(5) |
| C(16) | 56(9) | 39(8) | 50(9) | -13(7) | 12(7) | 26(7) |
| C(17) | 27(7) | 31(7) | 86(11) | 4(7) | 7(7) | -8(6) |
| C(18) | 46(8) | 30(8) | 161(16) | -37(10) | -7(10) | -10(7) |
| C(19) | 53(9) | 56(9) | 80(11) | -19(8) | 15(8) | 13(7) |
| C(20) | 48(8) | 29(7) | 80(10) | -10(7) | 36(7) | -3(6) |
| C(21) | 48(8) | 52(9) | 75(11) | -18(8) | 6(8) | 18(7) |
| C(22) | 61(9) | 31(8) | 130(14) | 2(9) | 54(10) | 8(7) |

**Table S5.** Hydrogen coordinates ( x 104) and isotropic displacement parameters (Å2 x 103) for **2**.

|  | x | y | z | U(eq) |
| --- | --- | --- | --- | --- |
| H(1) | 10266 | 4773 | 11860 | 63 |
| H(2) | 9949 | 4753 | 13119 | 76 |
| H(3) | 8228 | 3751 | 13378 | 87 |
| H(4) | 6706 | 3006 | 12322 | 82 |
| H(7A) | 5802 | 2046 | 11537 | 118 |
| H(7B) | 5469 | 1504 | 10650 | 118 |
| H(7C) | 4773 | 2725 | 10867 | 118 |
| H(9) | 4439 | 3287 | 9675 | 66 |
| H(10) | 3930 | 4029 | 8416 | 78 |
| H(11) | 5491 | 5006 | 7887 | 59 |
| H(12) | 7501 | 4977 | 8647 | 72 |
| H(18A) | 7022 | 791 | 9789 | 127 |
| H(18B) | 7485 | 362 | 9026 | 127 |
| H(18C) | 6876 | 1727 | 9047 | 127 |
| H(19A) | 8252 | 2140 | 8163 | 95 |
| H(19B) | 9616 | 1767 | 8130 | 95 |
| H(19C) | 9276 | 3215 | 8244 | 95 |
| H(20A) | 11630 | 2929 | 9001 | 73 |
| H(20B) | 12433 | 2133 | 9727 | 73 |
| H(20C) | 12119 | 3586 | 9850 | 73 |
| H(21A) | 12294 | 2579 | 11249 | 90 |
| H(21B) | 11816 | 1272 | 11532 | 90 |
| H(21C) | 11299 | 2590 | 11770 | 90 |
| H(22A) | 8069 | 671 | 11017 | 103 |
| H(22B) | 8927 | 1624 | 11623 | 103 |
| H(22C) | 9437 | 266 | 11448 | 103 |
